# Supplementary material for: A Retrospective Paired Comparison Between Untargeted Next Generation Sequencing and Conventional Microbiology Tests With Wisely Chosen Metagenomic Sequencing Positive Criteria
Source: Front Med (Lausanne). 2021 Oct 6;8:686247. doi: 10.3389/fmed.2021.686247 (PMC8526841; doi:10.3389/fmed.2021.686247)
Supplement: Supplementary file 3 [file Table_3.xlsx]

## Sheet: 肺炎
ID	specimen no.	male	age	immune disease	hema	chemo	transplant	steroids	suppressed immune	APACHE	SOFA	vasopressor	IMV on NGS dya	CRRT on NGS day	icu death	icu stay	ngs days	infection	library	Host proportion	total reads	bac-ngs sup	bac-ngs	bac-RPM	mapped Reads num	SDSMRN	Strictly mapped reads num	Coverage rate (%)	abundance (%)	fungi-ngs sup	fungi-ngs	fungi-RPM	mapped Reads num	SDSMRN	Strictly mapped reads num	Coverage rate (%)	abundance (%)	viral-nga sup	viral-ngs	RPM	mapped Reads num	SDSMRN	Coverage rate (%)	other ngs	RPM/SD	culture-bac	culture-fungi	other	atypical pcr
1321046	18S4053070	1	59	0	0	0	1	1	1	10		0	0	0	1	0	0	1	DNA	0.9866	18527986		0	0	0	0	0				耶氏肺孢子菌	4912.57	91020	96048.2	88979	40.93	99.93		(CMV)	1.45725	27	28.0657	0.573			0	0
1660306	18B4005459	1	35	0	0	0	1	1	1	14	12	0	0	0	0	3	0	0	DNA	0.9916	43295880		0	0	0	0	0				0	0	0	0	0				0	0	0	0				0	0
1746082	18S4053061	1	37	0	0	0	0	0	0	26	20	0	1	0	0	20	1	0	DNA	0.9898	26112974		0	0	0	0	0				0	0	0	0	0				0	0	0	0				0	0
1394101	18S4095851	1	62	0	0	0	0	0	1	4	23	1	1	1	1	6	2	1	DNA	0.9893	20368579		鲍曼不动杆菌	42.6638	869	542.011	552	0.9595	53.4		耶氏肺孢子菌	168.053	3423	3248.14	3308	2.01	99.89		0	0	0	0				0	0
1558397	18S4095860	1	56	0	0	0	1	1	1	15	4	0	0	0	0	5	1	1	DNA	0.9811	11513766		0	0	0	0	0				耶氏肺孢子菌	26.1426	301	505.482	291	0.1789	99.52		0	0	0	0				肺克	0
1423982	18S4053062	1	46	0	0	0	1	1	1	14	10	0	0	0	1	16	0	1	DNA	0.9859	10561662		不液化莫拉菌	599.906	6336	9454.95	4993	12.56	57.59		耶氏肺孢子菌	99.1321	1047	1950.45	1030	0.6216	99.95		0	0	0	0				0	0
1503675	18S4095861	0	73	0	0	0	0	0	0	8	14	1	1	0	1	5	4	1	DNA	0.9756	15559387		0	0	0	0	0				耶氏肺孢子菌	1.54248	24	15.4248	12	0.0143	98.84		0	0	0	0				0	0
1414890	18S4095828	0	61	0	0	0	1	1	1	20	14	0	1	1	1	17	2	1	DNA	0.9896	13122051		0	0	0	0	0				肺孢子虫	3.65796	48						0	0	0	0				0	0
1721042	18B4089500	1	62	0	0	0	1	1	1	12	10	0	1	0	0	1	0	0	DNA	0.989	41882880		0	0	0	0	0				0	0	0	0	0				0	0	0	0				0	0
1733375		1	69	0	0	0	1	1	1	10	13	0	1	0	0	1	0	1																												0	烟曲霉
7624006	18S0133158	1	45	0	0	0	0	0	0	17	4	1	1	1	0	68	48	1	RNA	0.9932	26448754		肺炎克雷伯菌	133.125	3521						0	0	0	0	0				CMV	0.453708	12	6.80561	0.6378			CRKP	0
2445236	18S4340499	0	57	0	0	0	0	1	1	16	7	0	1	0	0	33	0	1	RNA	0.9584	11450504		肺炎克雷伯菌	10.3052	118	80.3458	46	0.1056	4.95		0	0	0	0	0				0	0	0	0				敏感肺克	0
																					11450504		鲍曼不动杆菌	6.89926	79	73.3592	42	0.0966	4.52
11015584	18S3300103	0	53	0	1	0	0	1	1	14	6	1	1	0	1	17	1	1	DNA	0.9517	17527791		肺炎克雷伯菌	1.1981	21	11.4105	10	0.0188	15.13		耶氏肺孢子菌	6.38985	112	133.502	117	0.0726	96.92		0	0	0	0				0	0
10779081	18S0133125	1	51	0	0	0	0	0	0	13	1	1	1	0	1	23	2	0	RNA	0.9934	14350890		0	0	0	0	0				毛霉	0.418093	6						0	0	0	0				鲍曼？铜绿？均CR	0
8881890	18S3300072	0	79	0	0	0	0	1	1	20	1	1	1	0	1	13	1	1	DNA	0.9742	28929418		流感嗜血杆菌	72.0374	2084						耶氏肺孢子菌	12.6169	365	235.746	341	0.2111	88.82		CMV	6.22204	180					0	0
																					28929418
3590573	18S3300073	1	43	0	0	0	0	1	1	26	3	1	1	0	1	5	0	1	DNA	0.9516	14884233		大肠埃希菌	113.476	1689	210.961	157	1.54	16.64		耶氏肺孢子菌	213.38	3176	4062.02	3023	1.87	85.88		(CMV)	112.67	1677	2183.52	29.08			0	0
11285185	18S3320696	1	51	0	0	0	0	0	0	14	8	0	1	0	0	26	4	1	DNA	0.957	6711815		肺炎链球菌	165.082	1108	1483.95	498	2.53	75.21		0	0	0	0	0				0	0	0	0				洋葱？	0
10803212	17S0287659	1	64	0	0	0	0	0	0	12	9	1	1	0	1	16	6	1	DNA	0.9684	5770642		铜绿假单胞菌	13696.9	79040	263409	76002	66.54	92.73		0	0	0	0	0				0	0	0	0				CR铜绿	0
11334054	18S4053780	1	43	0	0	0	0	0	0	14	2	1	1	1	1	6	1	0	DNA	0.993	26053937		肺炎克雷伯菌	1.84233	48	11.5146	15	0.0431	5.27		0	0	0	0	0				0	0	0	0				0	0
11043164	18S3300085	0	43	0	0	0	0	0	0	24	2	1	1	1	1	17	2	0	RNA	0.9444	15367242		0	0	0	0	0				0	0	0	0	0				0	0	0	0				0	0
11111113	18S3319015	1	24	0	0	0	0	0	0	31	10	1	1	1	1	13	5	0	RNA	0.957	14580631		鲍曼不动杆菌	23.4558	342	305.885	223	0.4168	77.42		0	0	0	0	0				0	0	0	0				0	0
10944390	18S3300544	1	84	0	0	0	0	0	0	43	10	1	1	1	1	7	0	0	DNA	0.9902	9504882		0	0	0	0	0				0	0	0	0	0				0	0	0	0				0	0
3736815	18S3319013	1	60	0	0	0	0	1	1	20	2	1	1	0	0	19	0	1	DNA	0.9586	6197098		鲍曼不动杆菌	3513.9	21776	46592.8	14437	22.66	67.16		0	0	0	0	0				0	0	0	0		诺卡7	RPM 1/1	0	0	肺组织奴卡
																					6197098		肺炎克雷伯菌	1129.4	6999	9188.17	2847	5.97	15.83
																					6197098		铜绿假单胞菌	160.075	992	2633.49	816	0.7205	1.83
3143283	18S3320684	1	67	0	0	0	0	0	0	15	7	1	1	0	1	31	22	1	DNA	0.9806	13104667		鲍曼不动杆菌	7064.05	92572	90538.7	59324	62.67	88.58		0	0	0	0	0				0	0	0	0				鲍曼	0
																					13104667
1698301	18S3319017	1	23	0	0	0	0	0	0	40	7	1	1	1	1	4	1	1	DNA	0.9627	9739315		0	0	0	0	0				0	0	0	0	0				腺病毒7型	1239.92	12076	4172.78	98.46			0	0
11434328	18S4056017	1	78	0	0	0	0	0	0	26	10	1	1	0	1	10	9	1	DNA	0.9834	11422568		嗜肺军团菌	1658.12	18940	28955	16537	22.11	64.64		PCP	0.525276	6						0	0	0	0				洋葱？	0
10813464	17S0287658	1	50	0	0	0	0	0	0	45	9	1	1	1	1	1	0	0	RNA	0.9777	9963707		铜绿假单胞菌	7275	72486	140060	69776	65.24	92.73		0	0	0	0	0				0	0	0	0				0	0
11280410		1	19	0	0	0	0	0	0	13	6	1	1	1	1	12	1	0																												0	0
11424863	18B4061123	1	67	0	0	0	0	0	1	23	13	1	1	0	1	9	2	1	DNA	0.9882	32667417		炭疽芽孢杆菌	120.579	3939						米曲霉	1.92853	63	4.28562	7	0.0083	42.2		0	0	0	0				0	赛多孢子
																					32667417										耶氏肺孢子虫	0.0918346	3	1.22446	2	0.0018	9.07
																					32667417										赛多孢子	0.0918346	3
11046285		1	73	0	0	0	0	0	0	21	2	1	1	1	1	17	5	0																												大肠	0
10863830	18S0133162	0	61	0	0	0	0	0	0	13	6	0	1	0	0	7	1	0	DNA	0.9864	13474296		鲍曼不动杆菌	0.9648	13	17.8117	12	0.0403	33.77		烟曲霉	1.33588	18	20.7803	14	0.0063	58.21		0	0	0	0				0	0
9229733	18S3300069	0	43	1	0	0	0	1	1	18	2	1	1	1	1	8	1	1	RNA	0.9615	4584927		0	0	0	0	0				0	0	0	0	0				(CMV)	96.8391	444	1901.88	8.86			0	0
																					4584927
11326584	18S3320704	1	18	0	0	0	0	0	0	26	12	0	0	0	0	18	2	0	DNA	0.9918	12325355		0	0	0	0	0				PCP	0.486801	6						0	0	0	0				洋葱	0
10799106	17S0287660	1	67	0	0	0	0	0	0	12	6	1	1	1	1	20	9	0	DNA	0.9605	5632957		鲍曼不动杆菌	13915.8	78387	205675	57928	65.85	65.35		0	0	0	0	0				0	0	0	0				CRKP	0
																					5632957		肺炎克雷伯菌	6964.02	39228	71806	20224	52	23.98
11077270	18S3320757	1	40	0	0	0	0	0	0	24	8	0	1	1	0	10	0	1	RNA	0.9604	4358337		嗜肺军团菌	0.688336	3	27.5334	6	0.0043	2.46		0	0	0	0	0				0	0	0	0				0	0
8838952	18S3300545	1	59	0	0	0	0	0	0	7	3	0	1	0	0	27	1	1	RNA	0.9903	10828215		0	0	0	0	0				0	0	0	0	0				0	0	0	0				0	0
1581130	18S3319099	1	53	0	0	0	0	0	0	8	3	1	1	0	0	59	9	1	DNA	0.985	325685		肺炎克雷伯菌	211.861	69	1596.63	26	0.1141	42.08		0	0	0	0	0				0	0	0	0				CRKP；嗜麦芽	0
																					325685		鲍曼不动杆菌	107.466	35	1535.23	25	0.0792	29.11
																					325685		嗜麦芽窄食单胞菌	33.775	11	614.09	10	0.0245	8.29
7684648	18S4056028	0	34	0	0	0	0	0	0	21	9	1	1	0	0	9	0	0	DNA	0.9225	17708148		0	0	0	0	0				0	0	0	0	0				0	0	0	0				0	0
11349474	18S4053742	1	76	0	0	0	0	0	0	19	3	1	1	1	1	8	7	1	DNA	0.9909	21091323		嗜肺军团菌	1187.93	25055	20632.2	21758	27.84	91.42		0	0	0	0	0				0	0	0	0				0	0
C937645		1	42	1	0	0	0	1	1	19	3	0	1	0	1	13	9	0																												0	0		0
2347344	18S3301863	1	63	1	0	0	0	1	1	24	10	1	1	0	0	41	3	1	RNA	0.9503	17921858		鲍曼不动杆菌	62.8283	1126	722.023	647	1.35	57.13		0	0	0	0	0				副流感病毒3型	29.0706	521	528.963	70.2			鲍曼	0		0
W276428	18S3301855	0	33	0	0	0	0	0	0	15	10	1	0	0	0	5	2	0	RNA	0.9557	19457392		0	0	0	0	0				0	0	0	0	0				0	0	0	0				大肠	0
2248907	18S0071360	0	25	1	0	0	0	1	1	16	7	0	0	0	0	7	0	1	RNA	0.9882	8003230		铜绿	85.4655	684	1564.37	626	1.24	20.23		肺孢子虫	6.37243	51	119.952	48	0.0783	30.45		0	0	0	0				铜绿	0		0
2328336	17S0285355	1	15	1	0	0	0	1	1	13	1	0	0	0	0	6	2	1	DNA	0.9894	13542821		鲍曼不动杆菌	8.7131	118	156.541	106	0.33	73.82		肺孢子虫	0.295359	4						0	0	0	0				0	0
27998334	18S3303172	1	37	0	1	0	0	0	1	30	19	1	1	0	1	10	2	1	DNA/RNA	0.9893	21275958		鲍曼不动杆菌	11.8914	253	147.584	157	0.3081	67.1		0	0	0	0	0				偏肺病毒	0.893027	19					0	0		0
C916037	18S3303099	1	75	0	0	0	0	0	0	18	7	1	1	0	1	28	5	1	DNA	0.944	27678227		鲍曼不动杆菌	4.94974	137	65.0331	90	0.1667	8.83		0	0	0	0	0				0	0	0	0				鲍曼	烟曲霉
2055642	17S3250495	0	43	1	0	0	0	1	1	20	11	0	1	0	1	7	1	1	DNA	0.9849	23147681		鲍曼	198.378	4592	3501.86	4053	13	96.14		0	0	0	0	0				CMV	3.15366	73	63.0733	3.5			鲍曼	0		0
2372703		1	67	0	0	1	0	0	1	29	20	1	1	1	0	16	1	1																												鲍曼	黄曲霉		0
2407129		0	67	1	0	0	0	1	1	22	11	1	1	0	1	2	1	1	DNA		13381313		肺炎链球菌	3.66182	49						肺孢子虫	46.6322	624						CMV	7.92149	106					金葡	0		0
																					13381313		金葡	20.6258	276
2261826	18S3301835	1	56	1	0	0	0	1	1	25	10	0	1	0	0	6	1	1	RNA	0.9856	50011152		鲍曼不动杆菌	32.2128	1611	466.296	1166	5	45.79		0	0	0	0	0				0	0	0	0		MTB-complex 3	RPM 0/1	0	0		0
																					50011152		肺炎克雷伯菌	0.899799	45	7.99822	20	0.1046	0.94
2375181		0	69	1	0	0	0	1	1	20	8	0	1	0	0	9	1	1																				CMV 72								0	0		0
2404795	19S0073727	0	70	1	0	0	0	1	1	22	5	0	1	0	1	5	1	1	DNA	0.9914	14240646		鲍曼不动杆菌	0.351108	5	4.21329	3	0.0051	-		耶氏肺孢子菌	60.531	862	1167.08	831	0.4389	-		CMV	0.140443	2	2.80886	0.0366			0	0		0
2306898	17S0835996	1	61	0	0	0	0	0	0	25	8	1	1	0	1	28	1	1	DNA	0.9558	5818367		0	0	0	0	0				0	0	0	0	0				0	0	0	0				0	梨头霉
2398333		1	33	0	0	0	0	0	0	18	10	1	1	0	0	15	1	1																										支原体	NA	0	0		支原体
2390441		1	65	1	0	0	0	1	1	21	10	0	1	0	1	13	1	1																				CMV 4								0			0
2390407		1	75	0	0	1	0	1	1	18	7	0	1	0	0	7	0	1																				CMV 13								0	0		0
C713262		1	63	0	0	0	1	0	1	18	11	0	1	0	0	47	12	1																				CMV 8								鲍曼	0		0
2352494	18B4005836	1	64	0	0	1	0	0	1	18	9	0	1	0	1	17	6	1	DNA	0.9591	19506833		铜绿	450.714	8792						耶氏肺孢子菌	1.94804	38	37.9354	37	0.0225	100		(CMV)	0.461377	9	9.22754	0.191			铜绿	0		0
2513467	19S0210650	1	42	1	0	0	0	1	1	22	9	0	1	0	0	21	1	0	DNA/RNA	0.9659	19167348		0	0	0	0	0				0	0	0	0	0				0	0	0	0				0	0		0
2225165	17P0836160	1	71	1	0	0	0	1	1	24	7	0	1	0	0	49	1	1	DNA	0.9896	16475384		结核	3.5204	58						0	0	0	0	0				0	0	0	0		TB 58	RPM 0/1	分支杆菌	烟曲，黄曲，		0
2230672	17S0836661	1	74	0	0	1	0	0	1	20	4	1	1	0	1	78	2	0	DNA	0.9898	13359205		0	0	0	0	0				0	0	0	0	0				0	0	0	0				鲍曼	0		0
2298960	19S0020170	0	77	1	0	0	0	1	1	26	9	0	0	0	0	24	9	1	RNA	0.9189	20138115		0	0	0	0	0				烟曲霉	3.77394	76	29.7942	30	0.0129	74.4		冠状病毒229E	0.198628	4	1.98628	0.7321			0	烟曲霉，构巢曲霉		0
2408658	19S0073803	1	69	0	1	0	0	0	1	20	12	1	1	0	1	37	2	0	DNA/RNA	0.9686	20903695		0	0	0	0	0				0	0	0	0	0				0	0	0	0				0	0		0
2416722	19S0210667	1	66	0	1	0	0	0	1	24	10	1	1	0	1	11	0	1	DNA/RNA	0.9656	14937583		鲍曼不动杆菌	0.200836	3	4.01671	3	0.003	9.28		耶氏肺孢子菌	45.9914	687	885.016	661	0.3509	95.75		CMV	0.200836	3	4.01671	0.0563			0	0		0
																					14937583		副流感嗜血杆菌	2.87865	43	37.4893	28	0.0494	7.84
																					14937583		金黄色葡萄球菌	0.267781	4	4.01671	3	0.0055	0.47
C926227	19S0210733	1	80	1	0	0	0	1	1	29	12	0	1	0	0	34	1	1	DNA/RNA	0.9414	23795603		鲍曼不动杆菌	1.63896	39	24.3743	29	0.0416	0.01		曲霉属	0.294172	7	2.52147	3	-	2.23		CMV	67.4074	1604	1338.9	17.19			0	烟曲霉		0
																					23795603		铜绿假单胞菌	25.2988	602	76.4847	91	0.3152	0.04
																					23795603		肺炎克雷伯菌	5.58927	133	52.1105	62	0.1015	0.01
2353381	18S3303058	0	59	1	0	0	0	1	1	13	7	0	1	0	0	8	2	0	DNA/RNA	0.9697	19060279		0	0	0	0	0				0	0	0	0	0				乙型流感病毒	2.57079	49	38.8242	12.77			0	0		0
2351515	18S3301921	0	51	1	0	0	0	1	1	20	8	1	1	0	0	9	0	1	RNA	0.9196	13112518		0	0	0	0	0				耶氏肺孢子菌	42.4785	557	681.791	447	0.3292	96.38		0	0	0	0				0	0		0
2025017	19S0077437	0	65	0	1	0	0	0	1	20	8	1	1	0	0	9	3	0	RNA	0.9688	14660724		肺炎链球菌	7.77588	114	55.9318	41	0.2621	11.03		0	0	0	0	0				0	0	0	0				0	0
2354517	18S3303042	0	57	0	1	0	0	0	1	20	9	0	1	0	0	20	2	1	DNA	0.9726	17475699		鲍曼不动杆菌	5.49334	96	62.9445	55	0.1174	60.48		耶氏肺孢子菌	30.2706	529	579.09	506	0.3141	99.5		0	0	0	0				0	0		0
2184649	20S4669933	0	70	1	0	0	0	1	1	17	9	0	1	0	0	6	3	1	DNA/RNA	0.9892	55385895		铜绿假单胞菌	9.47895	525	28.8882	80	0.2558	1.44		耶氏肺孢子菌	5.39849	299	102.192	283	0.1528	90.9		CMV	0.559709	31	10.8331	0.4372			0	0		0
																					55385895
W288918	19S0210734	1	54	0	1	0	0	0	1	22	12	1	0	0	1	2	0	1	DNA/RNA		17186433		铜绿假单胞菌	2996.2	51494	8050.54	6918	22.14	1.27		曲霉属	3889.06	66839	35085.8	30150	-	16.48		0	0	0	0				铜绿；嗜麦芽	0		0
																					17186433		嗜麦芽窄食单胞菌	168174	2890309	1.7041e+06	1464373	44.1	66.63
																					17186433		副流感嗜血杆菌	12884.3	221435	199967	171836	65.7	12.39
2407266	19S0073728	1	60	0	1	0	0	0	1	23	14	1	1	0	1	22	9	1	DNA	0.9515	25533702		铜绿假单胞菌	84.4374	2156	170.755	218	1.13	13.25		烟曲霉	6.22706	159	72.0616	92	0.0233	15.87		0	0	0	0				铜绿；肺克偶见	0		0
																					25533702		肺炎克雷伯菌	133.431	3407	1007.3	1286	2.54	26.16
C957196		0	27	1	0	0	0	1	1	11	5	0	1	0	1	22	4	1																												0	0		0
2339876	18S3301803	1	53	1	0	0	0	1	1	32	18	1	1	0	1	2	1	1	RNA	0.9886	26742882		鲍曼不动杆菌	3.8141	102	59.829	80	0.3422	2.44		烟曲霉	106.533	2849	1670.72	2234	1.25	24.97		乙型流感病毒	3.44017	92	20.9402	50.96			0	黄曲霉;烟曲霉		0
																					26742882										米曲霉	210.336	5625	265.491	355	1.91	38.22
2029817	17S0835674	1	41	0	0	1	0	0	1	26	10	1	1	0	1	3	1	1	DNA	0.959	19127856		铜绿	252.72	4834	4782.55	4574	8.7	-		0	0	0	0	0				0	0	0	0				铜绿	0		0
2517565	19S0210678	1	19	1	0	0	0	1	1	15	3	0	0	0	0	7	0	1	DNA	0.97	23715026		鲍曼不动杆菌	29.2641	694	352.519	418	0.7131	84.18		烟曲霉	1.60236	38	20.2403	24	0.0056	33.17		0	0	0	0				鲍曼少量	0		0
																					23715026		铜绿假单胞菌	0.126502	3	0.843347	1	0.0018	5.89
2250223	17S0837499	0	74	1	0	0	0	1	1	22	10	0	1	0	1	31	6	0	DNA	0.9875	8442385		0	0	0	0	0				0	0	0	0	0				0	0	0	0				0	0
2413042	19S0210659	1	53	0	0	0	1	0	1	19	8	0	1	0	0	5	0	1	DNA/RNA	0.9776	36660634		肺炎链球菌	0.818316	30	2.72772	5	0.0531	6.98		耶氏肺孢子菌	0.218218	8	3.27327	6	0.004	9.51		CMV	0.300049	11	6.00099	0.1098			0	0		0
																					36660634		鲍曼不动杆菌	0.354604	13	4.9099	9	0.0112	1.56
2279407		0	60	1	0	0	0	1	1	20	10	1	1	0	1	2	0	1																												鲍曼，肺克，	0		0
2139127	18S4002374	0	76	1	0	0	0	1	1	21	10	0	1	0	1	21	3	1	DNA	0.9561	22109941		铜绿假单胞菌	4.52285	100	76.8885	85	0.0732	5.98		耶氏肺孢子菌	128.72	2846	2465.86	2726	1.67	99.34		0	0	0	0				0	黄曲霉		0
2375087	18S3322527	0	34	1	0	0	0	1	1	12	8	0	0	0	0	11	2	1	DNA	0.923	12748745		肺克	43.6121	556	331.013	211	0.4951	7.79		0	0	0	0	0				0	0	0	0				肺克，金葡	0		0
																					12748745		金葡	0.705952	9	9.41269	6	0.0155	0.24
2334444	18S0071354	0	53	1	0	0	0	1	1	20	9	0	1	0	1	3	0	1	DNA	0.9871	14234666		铜绿假单胞菌	917.83	13065	17787.6	12660	20	95.62		烟曲霉	75.3091	1072	1143.69	814	0.44	97.02		0	0	0	0				铜绿	0		0
																					14234666										PCP	0.491757	7
2254092	19S0073798	0	29	1	0	0	0	1	1	30	13	0	0	0	0	7	1	0	DNA/RNA	0.9615	22386298		鲍曼不动杆菌	0.580712	13	8.93404	10	0.0159	1.96		0	0	0	0	0				博卡病毒1型	1.20609	27	21.4417	23.45			0	0		0
																					22386298		铜绿假单胞菌	0.670053	15	11.6142	13	0.011	0.91
C939376		1	43	0	0	0	0	0	0	6	6	0	0	0	1	3	0	1																				腺病毒 62						支原体	NA	0	0		支原体
2423265	19S0210744	1	64	1	1	0	0	1	1	20	9	0	0	0	0	5	0	1	DNA/RNA	0.9799	34905194		0	0	0	0	0				0	0	0	0	0				冠状病毒229E	69.8177	2437	1383.18	88.72			0	0		0
																					34905194																		CMV	0.0859471	3	1.71894	0.0549
2216866	17S0837471	1	76	0	0	1	0	0	1	20	9	1	1	0	1	22	1	0	DNA	0.9766	19410723		0	0	0	0	0				0	0	0	0	0				0	0	0	0				0	0
C914707	18S4002412	1	53	0	1	0	0	0	1	23	11	0	1	0	1	17	1	1	DNA	0.9629	13492196		嗜肺军团菌	166.689	2249	2829.78	1909	3.17	79.68		0	0	0	0	0				0	0	0	0				0	0		军团
2364565	18S4002289	1	56	1	0	0	0	1	1	19	4	0	1	0	0	23	1	0	DNA	0.9529	14468803		鲍曼不动杆菌	11.9568	173	164.492	119	0.2116	6.96		0	0	0	0	0				(CMV)	9.39953	136	170.021	2.8			0	0		0
																					14468803		铜绿假单胞菌（59）	9.67599	140	146.522	106	0.1022	3.37
2513524	19S0210652	1	59	0	0	0	0	0	0	36	9	1	1	1	1	17	2	0	DNA/RNA	0.9452	15541744		0	0	0	0	0				0	0	0	0	0				0	0	0	0				0	0
2410890	19S0210649	1	52	1	0	0	0	1	1	21	8	0	1	0	1	14	1	1	DNA/RNA	0.9795	39134789		嗜麦芽窄食单胞菌	496.745	19440	6004.38	11749	7.72	-		耶氏肺孢子菌	254.531	9961	4833.55	9458	4.92	-		0	0	0	0				嗜麦芽	0		0
																					39134789										雅致放射毛霉	3.90956	153	76.1471	149	0.0195	-
2198146	17S0835599	1	53	1	0	0	0	1	1	14	8	1	1	0	1	3	0	1	DNA	0.9726	8284423		0	0	0	0	0				0	0	0	0	0				CMV	21.124	175	403.166	8.6			0	0		0
2398377	19S0073790	1	70	1	0	0	0	1	1	15	9	0	1	0	1	4	1	1	DNA/RNA	0.9591	23794938		鲍曼不动杆菌	5.79955	138	81.5299	97	0.1688	12.6		烟曲霉	9.70795	231	128.599	153	0.0393	2.97		CMV	33.9148	807	664.847	15.31			0	烟曲霉;土曲霉		0
																					23794938		铜绿假单胞菌	0.252154	6	4.20257	5	0.0044	0.33		土曲霉	1.17672	28	21.8534	26	0.0047	0.36
																					23794938										耶氏肺孢子菌	109.267	2600	2106.33	2506	1.53	99.3
2376662		0	35	1	0	0	0	1	1	13	8	0	1	1	1	26	9	1																				CMV 33								鲍曼	土曲霉		0
2281336	18B4005835	1	38	0	0	0	0	0	0	28	8	1	1	0	0	67	13	0	DNA	0.9772	18137625		鲍曼不动杆菌	22.1087	401	296.621	269	0.4885	61.53		0	0	0	0	0				(CMV)	1.32322	24	26.4643	0.5047			敏感肺克；洋葱	0
																					18137625		肺炎克雷伯菌	2.86697	52	24.259	22	0.0466	5.85
																					18137625		铜绿假单胞菌	1.81942	33	29.7724	27	0.0241	3.04
2410727	19S0210684	1	63	0	1	0	0	0	1	15	10	0	1	0	1	17	2	1	DNA/RNA	0.9656	51608249		0	0	0	0	0				耶氏肺孢子菌	138.718	7159	2644.93	6825	3.57	95.02		CMV	3.9141	202	77.507	2.6	奴卡 2515/918	RPM 1/SD 1	0	0	奴卡	0
																					51608249		金黄色葡萄球菌	0.930084	48	10.4634	27	0.0661	2.62		黄曲霉	11.0835	572	13.5637	35	0.0633	1.64
2255240	18P0071052-1	0	74	0	0	0	0	0	0	28	15	0	1	0	1	11	8	0	DNA	0.9873	19790182		0	0	0	0	0				0	0	0	0	0				0	0	0	0				0	0
2502510	19S0210658	1	51	1	0	0	0	1	1	15	14	0	0	0	0	2	2	1	DNA/RNA	0.9504	25590084		鲍曼不动杆菌	1854.94	47468	20970.6	26832	25.66	14.46		0	0	0	0	0				CMV	7.42475	190	147.713	2.27			0	0		0
																					25590084
																					25590084
W278157		1	65	1	0	0	0	1	1	26	8	1	1	0	1	39	1	1																												0	0		0
2320400		1	58	0	0	0	0	0	0	17	8	1	1	0	1	11	6	1	DNA	0.9856	5491032		鲍曼不动杆菌	222.363	1221	3838.99	1054	3.4	86.83		0	0	0	0	0				0	0	0	0				0	0		0
1768748	17S0285354	0	55	0	1	0	0	1	1	29	10	0	1	0	0	24	17	1	DNA	0.9869	14494979		鲍曼不动杆菌	28.0787	407	464.989	337	1.2	6.06		0	0	0	0	0				0	0	0	0				0	烟曲霉		0
																					14494979		铜绿假单胞菌	3.9324	57	75.8883	55	0.097	0.52
2394962		1	68	0	0	0	0	0	0	15	4	0	0	0	0	4	2	1																												0	0
2419810	19S0210685	0	52	1	0	0	0	1	1	17	7	0	1	0	1	12	2	1	DNA/RNA	0.9852	43116811		铜绿假单胞菌	1.71627	74	3.71085	8	0.0379	18.08		耶氏肺孢子菌	0.440663	19	8.81327	19	0.0097	37.21		0	0	0	0				0	0		0
																					43116811		肺炎克雷伯菌	0.556627	24	3.71085	8	0.0183	7.45
2505048	19S0210651	0	72	1	0	0	0	1	1	21	4	0	1	0	1	8	4	1	DNA	0.9597	21812014		0	0	0	0	0				耶氏肺孢子菌	21.3185	465	408.949	446	0.2368	-		CMV	0.550156	12	11.0031	0.1457			0	0		0
																					21812014
C959749	19S0210749	1	61	1	0	0	0	1	1	24	12	1	1	0	0	15	5	0	DNA	0.9482	20795379		铜绿假单胞菌	5.72243	119	16.3498	17	0.0615	0.19		0	0	0	0	0				CMV	7.59784	158	149.072	2.09			0	0		0
																					20795379		鲍曼不动杆菌	3.12569	65	39.4318	41	0.065	0.18
																					20795379		产酸克雷伯菌	2.69291	56	2.88526	3	0.0253	0.1
																					20795379		大肠埃希菌	34.046	708	55.7816	58	0.2762	0.36
2413158	19S0210676	0	49	1	0	0	0	1	1	36	10	1	1	0	1	2	2	1	DNA	0.9656	12870129		金黄色葡萄球菌	49.3391	635	630.918	406	0.8688	55.8		0	0	0	0	0				0	0	0	0				MRSA，少量不动	0		0
																					12870129		鲍曼不动杆菌	9.94551	128	113.441	73	0.133	8.3
2415138	19S0210664	1	78	1	0	0	0	1	1	24	14	1	1	0	1	29	1	1	DNA	0.9278	35970421		鲍曼不动杆菌	19828.1	713224	236930	426124	91.14	72.62		土曲霉	0.250206	9	5.00411	9	0.0004	3.41		CMV	21.3231	19	10.5642	0.2558			0	黄曲霉		0
																					35970421		铜绿假单胞菌	580.171	20869	1675.82	3014	9.71	1.2		PCP	190.24	6843
																					35970421		大肠埃希菌	584.758	21034	3358.87	6041	14.43	1.67
2400128	19S0054971	0	62	1	0	0	0	1	1	16	8	0	1	0	0	29	3	1	DNA	0.9347	19408342		鲍曼不动杆菌	5477.34	106306	70297.6	68218	66.71	89.98		耶氏肺孢子菌	1146.93	22260	22258.5	21600	12.29	99.93		CMV	4.84328	94	95.8351	1.97			0	黄曲霉		0
C698647	19S0210729	0	38	1	0	0	0	1	1	15	14	0	1	1	1	28	1	1	DNA	0.9583	26764877		0	0	0	0	0				耶氏肺孢子菌	240.016	6424	4532.06	6065	3.21	99.63		CMV	10.4241	279	206.988	3.5			0	0		0
																					26764877
2366640	18S4002375	0	55	0	1	0	0	0	1	15	6	0	1	0	0	10	2	1	DNA	0.9666	15884035		肺炎克雷伯菌	3.39964	54	28.9599	23	0.0484	19.03		耶氏肺孢子菌	0.440694	7	7.55476	6	0.0041	70.17		0	0	0	0				0	0		0
2251638	17S0839947	1	56	0	0	0	0	0	0	17	9	0	1	0	0	22	0	1	RNA	0.9853	7529902		鲍曼不动杆菌	9.56188	72	164.677	62	0.22	54.24		0	0	0	0	0				甲流H3N2	3.98412	30	63.7458	11			0	0
																					7529902																		H5N1	2.25767	17	18.5925	11
																					7529902																		H7N9	2.78888	21	13.2804	8.4
2505567	19S0077518	1	54	0	0	0	0	0	0	16	11	1	1	0	1	32	1	1	DNA/RNA	0.9587	23549727		鲍曼不动杆菌	5569.07	981	335.46	395	2.24	2.36		0	0	0	0	0				0	0	0	0				鲍曼	0
																					23549727		肺炎链球菌	41.6565	131150	72231.8	85052	72.77	89.36
																					23549727		铜绿假单胞菌	3.56692	84	62.8457	74	0.0616	0.06
																					23549727		嗜麦芽窄食单胞菌	0.552023	13	7.6434	9	0.0144	0.01
2400130	19S0077439	1	59	0	0	0	0	0	0	21	12	1	1	0	1	19	3	1	DNA	0.9596	14888212		鲍曼不动杆菌	12.4931	186	150.455	112	0.2268	20.62		0	0	0	0	0				0	0	0	0				肺克	0
2419997	19S0210731	0	61	0	0	0	0	0	0	18	8	1	1	0	1	21	1	0	DNA	0.9464	24212835		铜绿假单胞菌	13.2161	320	50.3865	61	0.1683	45.07		0	0	0	0	0				0	0	0	0				0	0		0
																					24212835		肺炎克雷伯菌	1.07381	26	9.08609	11	0.0198	4.65
																					24212835		流感嗜血杆菌	0.99121	24	6.60807	8	0.0453	12.75
																					24212835		鲍曼不动杆菌	0.578206	14	9.08609	11	0.0142	3.33
2321240	17S3250494	1	60	0	0	0	0	0	0	12	8	0	1	0	1	0	0	0	DNA	0.9804	7960385		0	0	0	0	0				0	0	0	0	0				0	0	0	0				鲍曼	0
2141857	18S3301822	1	63	0	0	0	0	0	0	19	12	0	0	0	1	16	6	0	RNA	0.982	32630057		0	0	0	0	0				0	0	0	0	0				0	0	0	0				0	0
420407	18S0120054	1	89	0	0	0	0	0	0	29	10	1	1	0	1	18	3	1	RNA	0.9937	8448383		0	0	0	0	0				0	0	0	0	0				乙型流感病毒	3.31424	28	66.2849	18			0	0
101165418	18B0120169	1	52	0	0	0	0	0	0	23	9	1	1	0	0	18	2	1	DNA	0.9884	13590996		鲍曼不动杆菌	4.26753	58	51.5047	35	0.1907	31.28		0	0	0	0	0				0	0	0	0				CRAB	0
386185	18S3302260	0	68	0	1	0	0	0	1	19	3	0	1	0	0	7	1	1	RNA	0.9877	12437775		嗜肺军团菌	30.3109	377	599.786	373	1.39	78.72		0	0	0	0	0				0	0	0	0				0	0
101224626	18B0120168	1	28	0	0	0	0	0	0	19	14	1	1	0	0	21	0	1	DNA	0.9933	19755418		金黄色葡萄球菌	1.26548	25	19.2352	19	0.1089	18.48		0	0	0	0	0				0	0	0	0				金葡	0
101237670	18B3297161	0	6	0	0	0	0	0	0	26	14	1	1	1	0	9	2	1	DNA	0.8545	13887607		0	0	0	0	0				0	0	0	0	0				腺病毒7型	488.709	6787	2171.72	98.08			0	0
101249635	18S3319607	1	67	0	0	0	0	0	0	8	5	1	0	0	0	42	1	0	RNA	0.95	16772611		0	0	0	0	0				0	0	0	0	0				0	0	0	0				敏感肺克	0
101225252	18B3297194	1	76	0	0	0	0	0	0	22	12	1	1	0	1	16	11	1	DNA	0.9886	25067691		鲍曼不动杆菌	33.23	833	485.884	609	2.56	66.14		0	0	0	0	0				0	0	0	0				CRAB	0
101218054	17B0588535	1	87	0	0	0	0	0	0	27	10	1	0	1	1	17	14	1	DNA	0.9927	26176908		0	0	0	0	0				烟曲霉	0.267411	7	4.58419	6	0.0029	24.64		0	0	0	0				CRAB	0
101129181	18S3302261	1	55	0	0	0	0	0	0	19	4	1	1	0	0	11	1	0	DNA	0.9918	3363030		0	0	0	0	0				黄曲霉	6.83907	23	5.94702	1	0.0069	62.35		0	0	0	0				0	0
101250234	18S3319834	1	55	0	0	0	0	0	0	5	2	0	1	0	0	5	0	1	RNA	0.9453	26634078		肺炎链球菌	170.233	4534	554.177	738	9.23	16.35		0	0	0	0	0				0	0	0	0				0	0
101229980	18B3297181	1	62	0	0	0	0	0	0	19	3	0	1	0	0	18	4	0	DNA	0.9841	26864452		0	0	0	0	0				0	0	0	0	0				0	0	0	0				0	0
101217256	17S0589322	1	55	0	0	0	0	0	0	14	5	0	0	0	0	1	4	1	DNA	0.9846	275340		肺炎链球菌	345.028	95	2106.49	29	0.51	26.56		0	0	0	0	0				0	0	0	0				0	0
																					275340		流感嗜血杆菌	29.055	8	508.462	7	0.049	2.5
101249846	18S3319951	1	70	0	1	0	0	0	1	18	11	1	0	1	0	9	7	1	RNA	0.9653	9076075		肺炎克雷伯菌	10.5773	96	79.3294	36	0.0861	1.21		0	0	0	0	0				0	0	0	0				肺克	0
101235177	18B3297159	1	57		0	0	0	0	1	27	13	1	1	1	1	42	0	1	DNA	0.9579	37395438		鲍曼不动杆菌	13.9054	520	171.679	321	0.6314	75.5		0	0	0	0	0				0	0	0	0				CRAB	0
																					37395438		肺炎克雷伯菌	0.374377	14	2.67412	5	0.0125	1.49
446561		1	88	0	0	0	0	0	0	19	9	1	1	0	1	24	1	0																												0	0
101218285	17S0589323	1	31	0	0	0	0	0	0	27	11	0	0	0	0	12	10	1	DNA	0.9866	17260346		铜绿假单胞菌	19.4666	336	349.935	302	0.52	1.38		0	0	0	0	0				0	0	0	0				金葡	0
101250824	18B3318240	1	54	0	0	0	0	0	0	35	12	1	1	0	0	39	1	1	DNA	0.9567	40451909		嗜肺军团菌	25.8331	1045	436.073	882	1.49	92.07		0	0	0	0	0				0	0	0	0				0	0
101226476	18S3302259	1	80	0	0	0	0	0	0	16	7	1	1	0	0	10	1	1	RNA	0.987	10516462		鲍曼不动杆菌	2.47231	26	38.0356	20	0.068	5.58		0	0	0	0	0				0	0	0	0				0	0
																					10516462		金黄色葡萄球菌	70.461	741	1257.08	661	2.99	2.89
101228426	18B3297188	1	69	0	0	0	0	0	0	13	2	1	1	0	1	7	1	0	DNA	0.9894	20143489		0	0	0	0	0				0	0	0	0	0				0	0	0	0				0	0
101172935		0	69		0	0	0	0	1	26	12	1	1	0	1	3	0	1																												鲍曼	0
101027025	18S3302230	0	86	0	0	0	0	0	0	21	2	0	0	0	1	7	1	0	DNA	0.9865	7322656		0	0	0	0	0				0	0	0	0	0				0	0	0	0				0	0
101234542	18S3302239	1	37		0	0	0	1	1	27	13	1	1	1	1	13	0	1	RNA	0.9122	8539869		鲍曼不动杆菌	10382.4	88664	127157	54295	62.09	87.49		耶氏肺孢子菌	19.204	164	351.293	150	0.0973	54.44		0	0	0	0				CRAB	0
339523	18B3318273	1	83	0	0	0	0	0	0	24	11	1	1	0	1	4	1	1	DNA	0.9533	37126652		铜绿假单胞菌	0.0808045	3	1.61609	3	0.0022	0.97		0	0	0	0	0				(CMV)	0.430957	16	8.61915	0.3403			嗜麦芽，铜绿	0
																					37126652
101254210	18B3318276	1	41	0	0	0	0	0	0	7	7	0	1	0	0	15	1	0	DNA	0.9718	43834521		0	0	0	0	0				0	0	0	0	0				0	0	0	0				0	0
101229724	18B3297184	1	70	0	0	0	0	0	0	29	15	1	1	1	1	12	1	1	DNA	0.9939	9830693		鲍曼不动杆菌	1797.23	17668	26661.4	13105	36.66	93.39		0	0	0	0	0				0	0	0	0				CRAB	0
101221262	18B0120175	1	54	0	0	0	0	0	0	24	14	1	1	1	1	41	2	1	DNA	0.9898	23326933		0	0	0	0	0				0	0	0	0	0				0	0	0	0				CRAB	0
101233100	18B3297176	0	67	0	0	0	0	0	0	28	7	1	1	1	1	9	1	1	DNA	0.9861	38140187		0	0	0	0	0				0	0	0	0	0				0	0	0	0				0	0
101234559	18B3296993	0	83	0	0	0	0	0	0	19	6	1	1	0	1	33	1	0	DNA	0.9687	39514987		0	0	0	0	0				0	0	0	0	0				CMV	0.683285	27	7.08592	0.5729			0	0
334897	18B3297052	0	77	0	0	0	0	0	0	20	9	1	1	0	0	19	1	0	DNA	0.9713	52953269		产酸克雷伯菌（8）	1.00088	53	8.30921	22	0.0419	13.53		0	0	0	0	0				0	0	0	0				0	0
101237660	18B3297160	1	75	0	0	0	0	0	0	18	7	1	1	0	0	15	2	1	DNA	0.8408	21727012		铜绿假单胞菌	15.6947	341	205.274	223	0.2483	42.15		0	0	0	0	0				0	0	0	0				CRAB	0
101224965	18S0120029	0	72		0	0	0	1	1	33	12	1	1	0	1	2	1	1	RNA	0.9859	8431646		嗜麦芽窄食单胞菌	3556.6	29988	66053.5	27847	53.73	71.78		0	0	0	0	0				0	0	0	0				敏感肺克	0
																					8431646		鲍曼不动杆菌	406.564	3428	6013.06	2535	10.24	9.05
																					8431646		流感嗜血杆菌	194.505	1640	1081.64	456	10.52	9.36
																					8431646		金黄色葡萄球菌	53.3704	450	903.738	381	1.96	1.68
101223525	18B0120172	0	46	0	0	0	0	0	0	33	8	1	1	0	0	24	1	1	DNA	0.9877	26772752		鲍曼不动杆菌	1.15789	31	14.9406	20	0.0987	42.28		0	0	0	0	0				0	0	0	0				CRAB	0
368568	17S0589321	0	74	0	0	0	0	0	0	20	11	1	0	0	0	3	4	0	DNA	0.9911	13036013		0	0	0	0	0				0	0	0	0	0				0	0	0	0				0	0
101230460	18S3302229	1	67	0	0	0	0	0	0	23	26	1	1	0	0	45	6	1	RNA	0.9907	28865010		鲍曼不动杆菌	204.85	5913	3018.88	4357	15.74	81.67		0	0	0	0	0				0	0	0	0				CRAB	烟曲霉
101228428	18S3302219	1	39	0	0	0	0	0	0	15	7	1	1	0	0	18	0	1	RNA	0.9879	4812547		鲍曼不动杆菌	2401.64	11558	34779.9	8369	25.01	64.24		0	0	0	0	0				0	0	0	0				CRAB	0
101224632	18S0120042	1	34	0	0	0	0	0	0	26	10	1	1	1	0	21	0	1	RNA	0.9881	16669718		鲍曼不动杆菌	1.0798	18	17.9967	15	0.0578	35.36		0	0	0	0	0				0	0	0	0				CRAB	0
																					16669718		嗜麦芽寡养单胞菌	0.719868	12	14.3974	12	0.0313	21.36
101163348	18S3319831	1	82	0	0	0	0	0	0	18	8	1	1	0	1	15	2	1	RNA	0.9548	14951693		0	0	0	0	0				0	0	0	0	0				0	0	0	0				0	0
101223369	18S0120048	1	30	0	0	0	0	0	1	28	7	0	0	1	0	9	1	0	RNA	0.9835	11767993		鲍曼不动杆菌	1042.66	12270	15105.4	8888	26.5	50.83		0	0	0	0	0				0	0	0	0				CRAB	0
101254984	18B3318277	1	53	0	0	1	0	0	1	13	3	0	1	0	0	7	1	0	DNA	0.9588	32300873		0	0	0	0	0				0	0	0	0	0				0	0	0	0				0	0
101249489	18S3319826	1	55	1	0	0	0	0	1	15	6	0	1	0	0	11	0	1	RNA	0.9569	26322181		鲍曼不动杆菌	0.49388	13	4.55889	6	0.0159	7.38		耶氏肺孢子菌	0.341917	9	6.83834	9	0.0054	62.61		0	0	0	0				0	0
101237046	18S3302216	1	69	0	0	0	0	0	0	14	5	1	1	0	0	5	0	1	RNA	0.9439	24069681		0	0	0	0	0				0	0	0	0	0				0	0	0	0				0	0
101227454	18B3297190	0	81	1	0	0	0	1	1	23	6	1	1	0	0	22	1	1	DNA	0.9923	1769958		0	0	0	0	0				0	0	0	0	0				0	0	0	0				0	0
101236267	18B3297166	1	71	0	0	0	0	0	0	21	11	1	1	0	1	11	0	1	DNA	0.9378	29106208		肺炎链球菌	16.5944	483	132.618	193	1.11	62.37		0	0	0	0	0				0	0	0	0				0	0
101225675	18B3297197	1	45	0	0	0	0	0	0	22	14	1	1	1	0	38	1	1	DNA	0.9874	18431049		鲍曼不动杆菌	153.057	2821	2324.34	2142	8.36	89.2		0	0	0	0	0				腺病毒7型	30.4378	561	124.789	76.6			CRAB	0
101249653	18B3318270	1	42	0	0	0	0	0	0	12	2	0	1	0	0	9	1	1	DNA	0.9626	56799973		嗜肺军团菌	0.193662	11	3.16902	9	0.0159	4.37		0	0	0	0	0				0	0	0	0				0	0
101224839	18B0120166	1	50	0	0	0	1	0	1	22	5	0	0	0	1	2	1	1	DNA	0.9918	22524401		0	0	0	0	0				烟曲霉	0.133189	3	2.66378	3	0.0012	7.66		0	0	0	0				0	0
101218903	17S0589316	1	69	0	0	0	0	0	0	25	4	0	1	0	0	8	2	0	DNA	0.9919	21268696		0	0	0	0	0				0	0	0	0	0				0	0	0	0				0	0
101223693	18B0120171	1	85	0	0	0	0	0	0	25	5	0	0	0	1	9	1	1	DNA	0.99	30095817		肺炎链球菌	4.25308	128	45.189	68	0.7427	37.58		0	0	0	0	0				0	0	0	0				0	0
101228351	18B3297187	1	44	0	0	0	0	0	0	17	7	0	1	1	0	27	1	1	DNA	0.9881	20993096		0	0	0	0	0				0	0	0	0	0				(CMV)	0.285808	6	5.71616	0.3021			产酸克雷伯ESBL	0
101218403	17S0589324	1	73	0	1	0	0	0	1	15	6	1	1	0	1	25	12	1	DNA	0.991	12127719		鲍曼不动杆菌	1691.66	20516	29581.8	17938	43	94.61		0	0	0	0	0				0	0	0	0				CRAB	0
																					12127719		嗜麦芽窄食单胞菌	10.3894	126	181.403	110	0.31	0.5
101223477	18B0120170	1	70	0	0	0	0	0	0	13	3	0	0	0	0	10	2	1	DNA	0.9889	22390254		0	0	0	0	0				0	0	0	0	0				0	0	0	0		鹦鹉热衣原体10/6	0/1	0	0
101209225	18S3302217	0	70	0	0	0	0	0	0	13	7	1	1	0	0	8	1	1	RNA	0.9756	24238651		0	0	0	0	0				0	0	0	0	0				甲型流感病毒H5N1	0.742616	18	4.95077	7.94			0	0
																					24238651
[truncated: 14 more columns]
